# Supplementary material
Source: publisher figshare collection journal article supplement (https://acs.figshare.com/ndownloader/files/5322556)
Supplement: Supplementary file 1 [file 5322556]

# Effect of SiO<sub>2</sub> Nanoparticles on Wax Crystallization and Flow Behavior of Model Crude Oil

Xin Song,<sup>†</sup> Hongyao Yin,<sup>†</sup> Yujun Feng<sup>\*,†</sup> Sheng Zhang,<sup>‡</sup> and Yong Wang<sup>‡</sup>

<sup>†</sup> Polymer Research Institute, State Key Laboratory of Polymer Materials Engineering, Sichuan University, Chengdu 610065, People's Republic of China

<sup>‡</sup> Shengli Oilfield Shengli Chemicals Co. Ltd., Dongying 257055, People's Republic of China

Corresponding Author: \*yjfeng@scu.edu.cn

## 1. Additional results

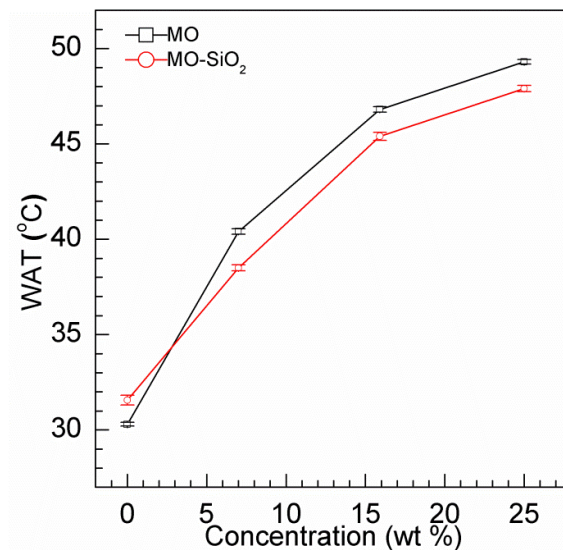

**Figure S1.** Wax appearance temperature of model oils with and without SiO<sub>2</sub> nanoparticles.

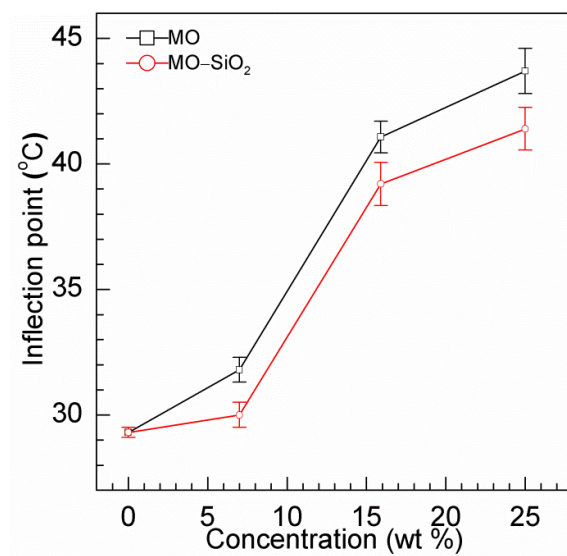

**Figure S2.** Inflection point of model oils treated and untreated with SiO<sub>2</sub> nanofluid.

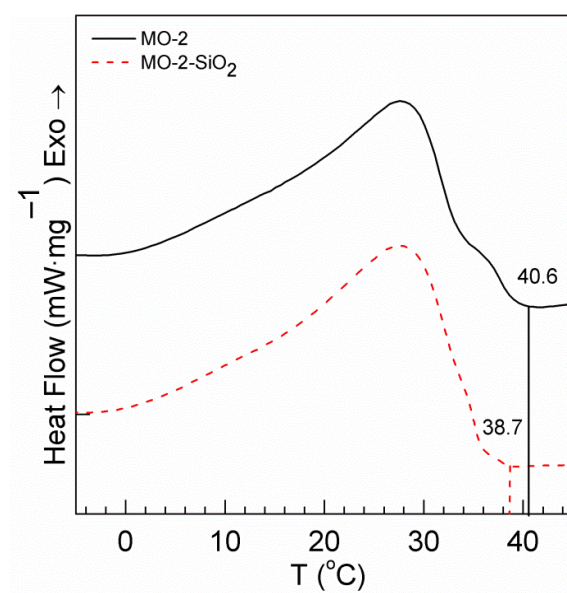

**Figure S3.** DSC cooling curves of MO-2 in the presence of absence of SiO<sub>2</sub> nanoparticles.

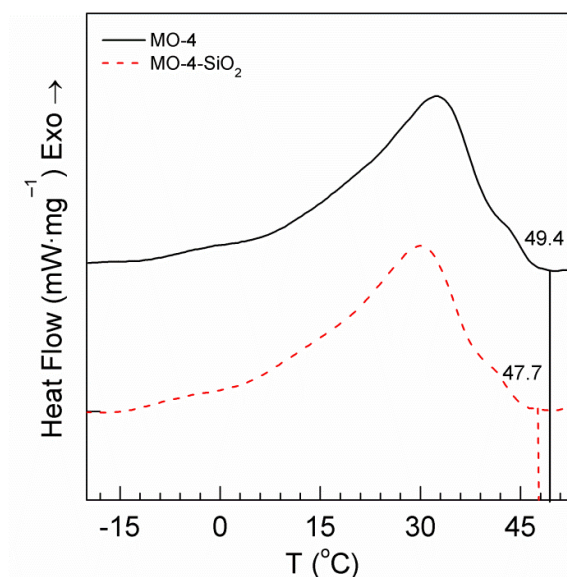

**Figure S4.** DSC cooling curves of MO-4 with and without SiO<sub>2</sub> nanoparticles.

## 2. Reliability and repeatability of experimental data

In order to make sure the experimental data is reliable, each sample was tested three times, and the results are shown in Figure S5 and Figure S6. As can be seen in the figures, the standard deviations of WAT and inflection point are less than 0.3 °C and 0.9 °C, respectively. They are all smaller than the minimum difference between the results before and after treated with SiO<sub>2</sub> nanoparticles. It means that repeatability meets the requirements of this study.

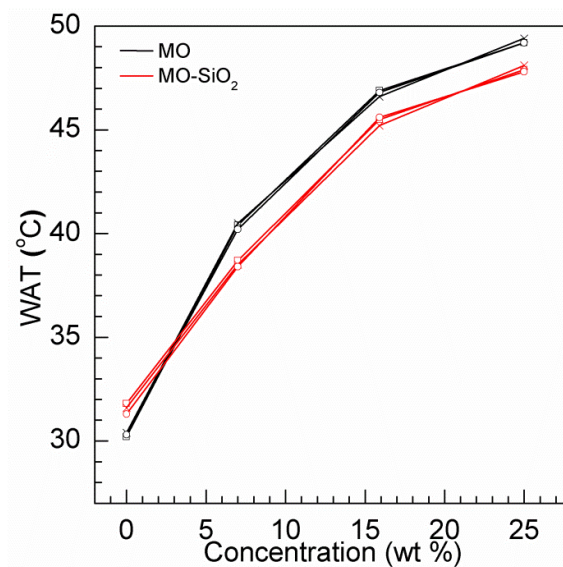

**Figure S5.** Repeatability of WAT. (□) 1st test, (×) 2nd test, (○) 3rd test.

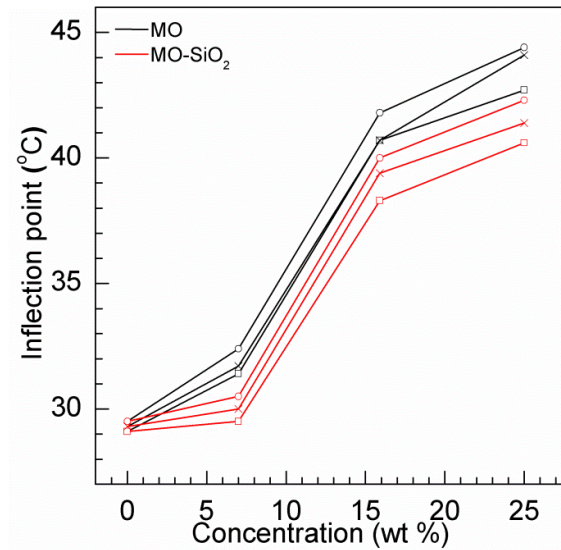

**Figure S6.** Repeatability of inflection temperature. (□) 1st test, (×) 2nd test, (○) 3rd test.

### 3. The effect of SiO<sub>2</sub> nanoparticles on crystallization and rheological properties in crude oil

To study the effect of SiO<sub>2</sub> nanoparticles on the crystallization and rheological properties in crude oil, 0.2 g SiO<sub>2</sub> nanofluid was added to 20 g crude oil, and then stirred at 80 °C for 3 h.

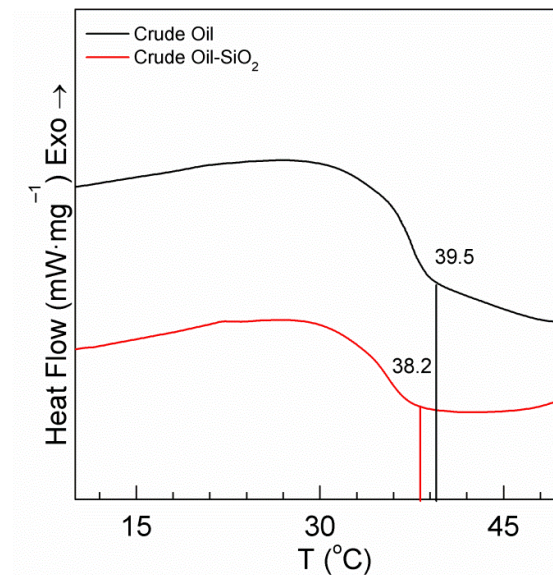

**Figure S7.** DSC cooling curves of crude oil untreated and treated with SiO<sub>2</sub> nanoparticles.

The thermal response of model oils before and after addition of SiO<sub>2</sub> nanoparticles is shown in Figure S7. The images of crude oil in the absence and presence of SiO<sub>2</sub> nanoparticles are shown in Figure S8. The viscosity-temperature Semi-logarithmic curves of crude oil with and without SiO<sub>2</sub> nanoparticles are shown in Figure S9. The corresponding

WAT and inflection point are shown in Table S1. As can be seen in these figures and table, after introducing  $\text{SiO}_2$  nanoparticles, both WAT and inflection point of crude oil are reduced, the amount of wax crystals decreased and the wax crystals were sparse. These phenomenon are consistent with the result of model oils which contain asphaltene and resin.

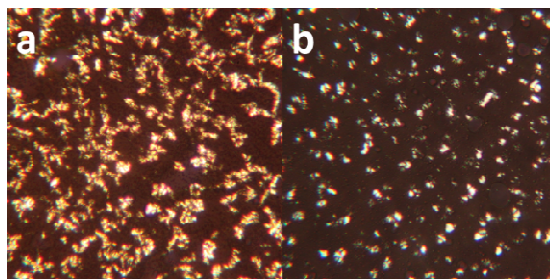

**Figure S8.** Polarized optical microscopy images of crude oil in the absence (a) and presence (b) of  $\text{SiO}_2$  at 25 °C.

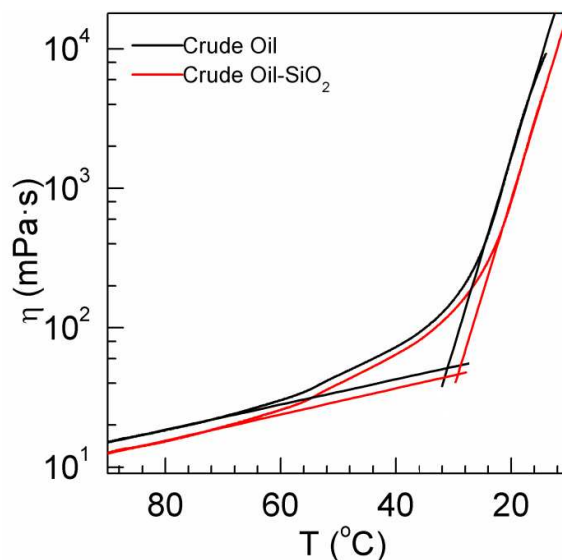

**Figure S9.** Semi-logarithmic curve of viscosity versus temperature for the crude oil untreated and treated with  $\text{SiO}_2$  nanofluid.

**Table S1.** Wax appearance temperature and inflection temperature for crude oil, untreated and treated with  $\text{SiO}_2$  nanoparticles.

| WAT (°C)  |         | Inflection temperature (°C) |         |
|-----------|---------|-----------------------------|---------|
| untreated | treated | untreated                   | treated |
| 39.5      | 38.2    | 31.1                        | 29.2    |
